# Supplementary material
Source: PubMed Central journal article supplement (PMC5516949)
Supplement: NIHMS824857-supplement-Letter_outlining_David_Yue_s_authorship.pdf [file NIHMS824857-supplement-Letter_outlining_David_Yue_s_authorship.pdf]

**Gordon F. Tomaselli, M.D.**  
Chief of Cardiology  
Michel Mirowski, M.D. Professor of Cardiology

**Division of Cardiology**  
600 North Wolfe Street/Blalock 910  
Baltimore Maryland 21287  
T 410-955-3097  
F 410-614-3191  
gtomasel@jhmi.edu

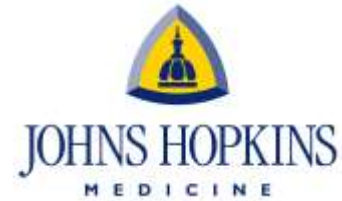

October 17, 2016

Gemma Bridges-Lyman  
Circulation Research  
3355 Keswick Rd, Main Bldg 103  
Baltimore, MD 21211 USA  
T: 410-327-5005  
[circulation.research@circresearch.com](mailto:circulation.research@circresearch.com)  
[gemma.bridges@circresearch.com](mailto:gemma.bridges@circresearch.com)

Re: CIRCRES/2016/309283: "A precision medicine approach to the rescue of function in malignant calmodulinopathic long QT syndrome"

Dear Gemma,

Unfortunately, Dr. David Yue, one of the authors on our manuscript entitled "*A precision medicine approach to the rescue of function in malignant calmodulinopathic long QT syndrome*" passed away before publication of this work. His wife, Dr. Nancy Yue, is completing the copyright and disclosure forms on his behalf.

I would like to verify that David meets the criteria for authorship on this paper. He was the PI of the lab where this project was initiated and he was the driving force and largely conceived and designed all of the critical experiments in this project before his untimely passing. He directly supervised the first and second authors on this paper and participated in the analysis and interpretation of the data in the first versions of this work. He not only meets criteria for authorship, he is justifiably the senior author of this manuscript.

Please feel free to contact me if you have any other questions. Thanks again.

All the Best,

A handwritten signature in black ink, appearing to read "G. Tomaselli".

Gordon Tomaselli, M.D.  
Professor of Medicine, Cellular and Molecular Medicine
